# Supplementary material for: Paleoseismic history of the intermountain Rieti Basin (Central Apennines, Italy)
Source: Copernicus journal article supplement (doi:10.5194/egusphere-2025-2531), 2025-06-30

# Coulomb stress transfer preliminary results

Rieti BASIN

Livio et al. (Submitted to NHESS)

«Paleoseismic history of the intermountain Rieti Basin (Central Apennines, Italy)»

# Model Building

- Simplified fault traces
- Extended down to 10 km with a planar geometry
- Faults' attitude measured at surface.
- Max displacement constrained through paleoseismology and W&C94 empirical regression (i.e., 1 m for a Mw 6.6 eq).
- CSS is calculated by assuming a pure dip slip normal faulting on the northern and southern border fault.

## **Slip on seismogenic fault:**

Max 1 m; tapering laterally.

For the MODEL 1 measured through paleoseismology (event D).

## **Mechanical parameters:**

Poisson's Ratio: : 0.25

Young's Modulus: : 27000

Apparent Friction: : 0.4

Free surface at zero elevation reference surface (no topography considered)

# MODEL 1: Max displacement to the north

Southern border faults are mostly loaded (in EVENT D, those moved together with the main fault).

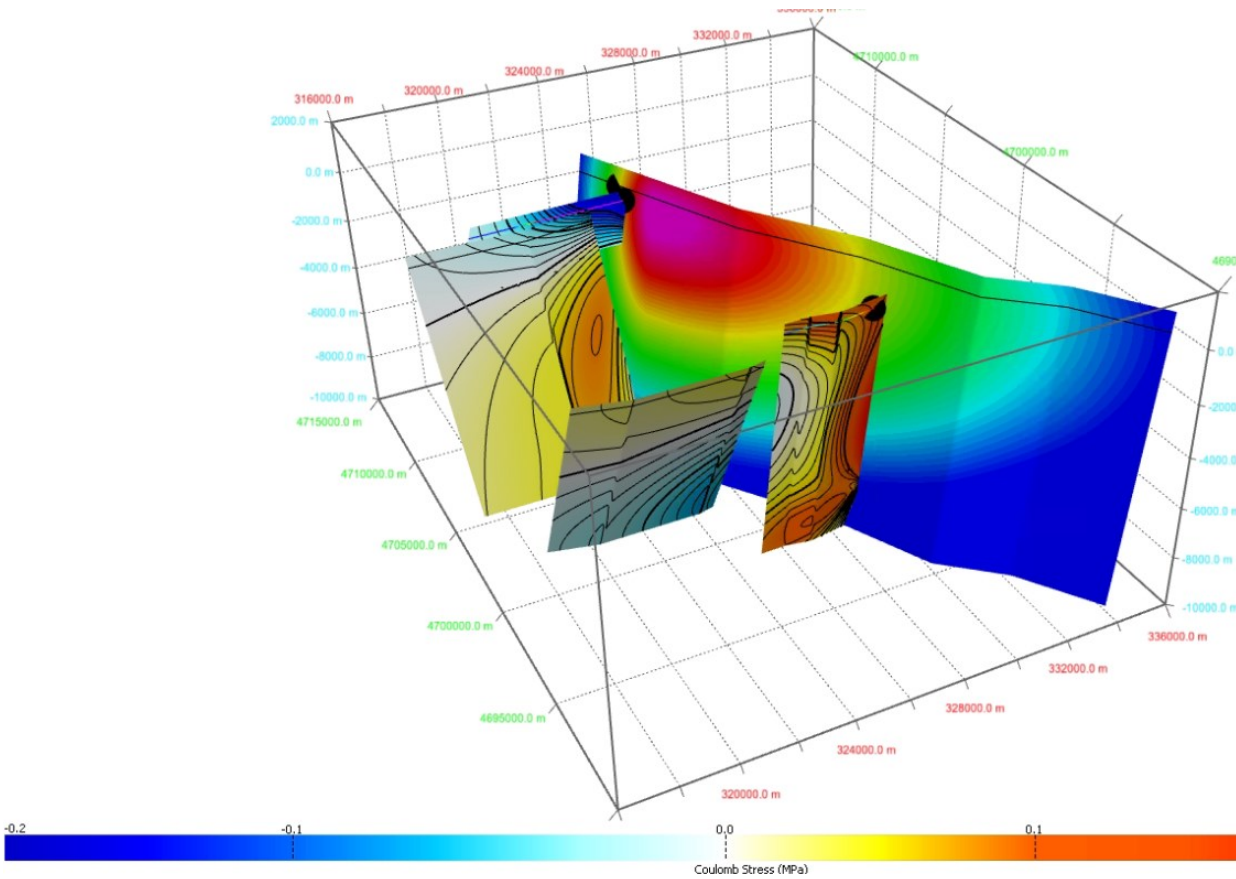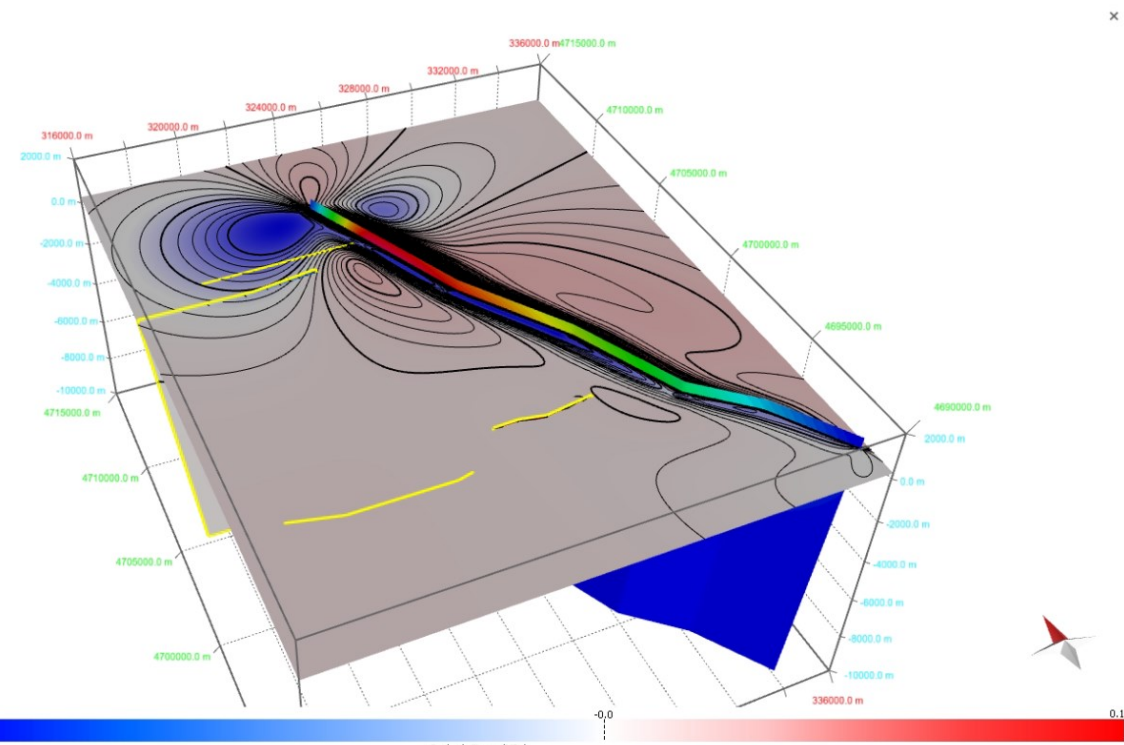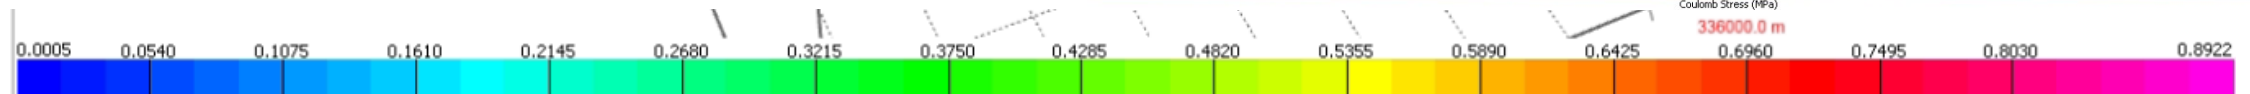

# MODEL 2: Max displacement at fault center

The southern border faults are positively loaded at shallow depths.  
Northern border faults are not loaded.

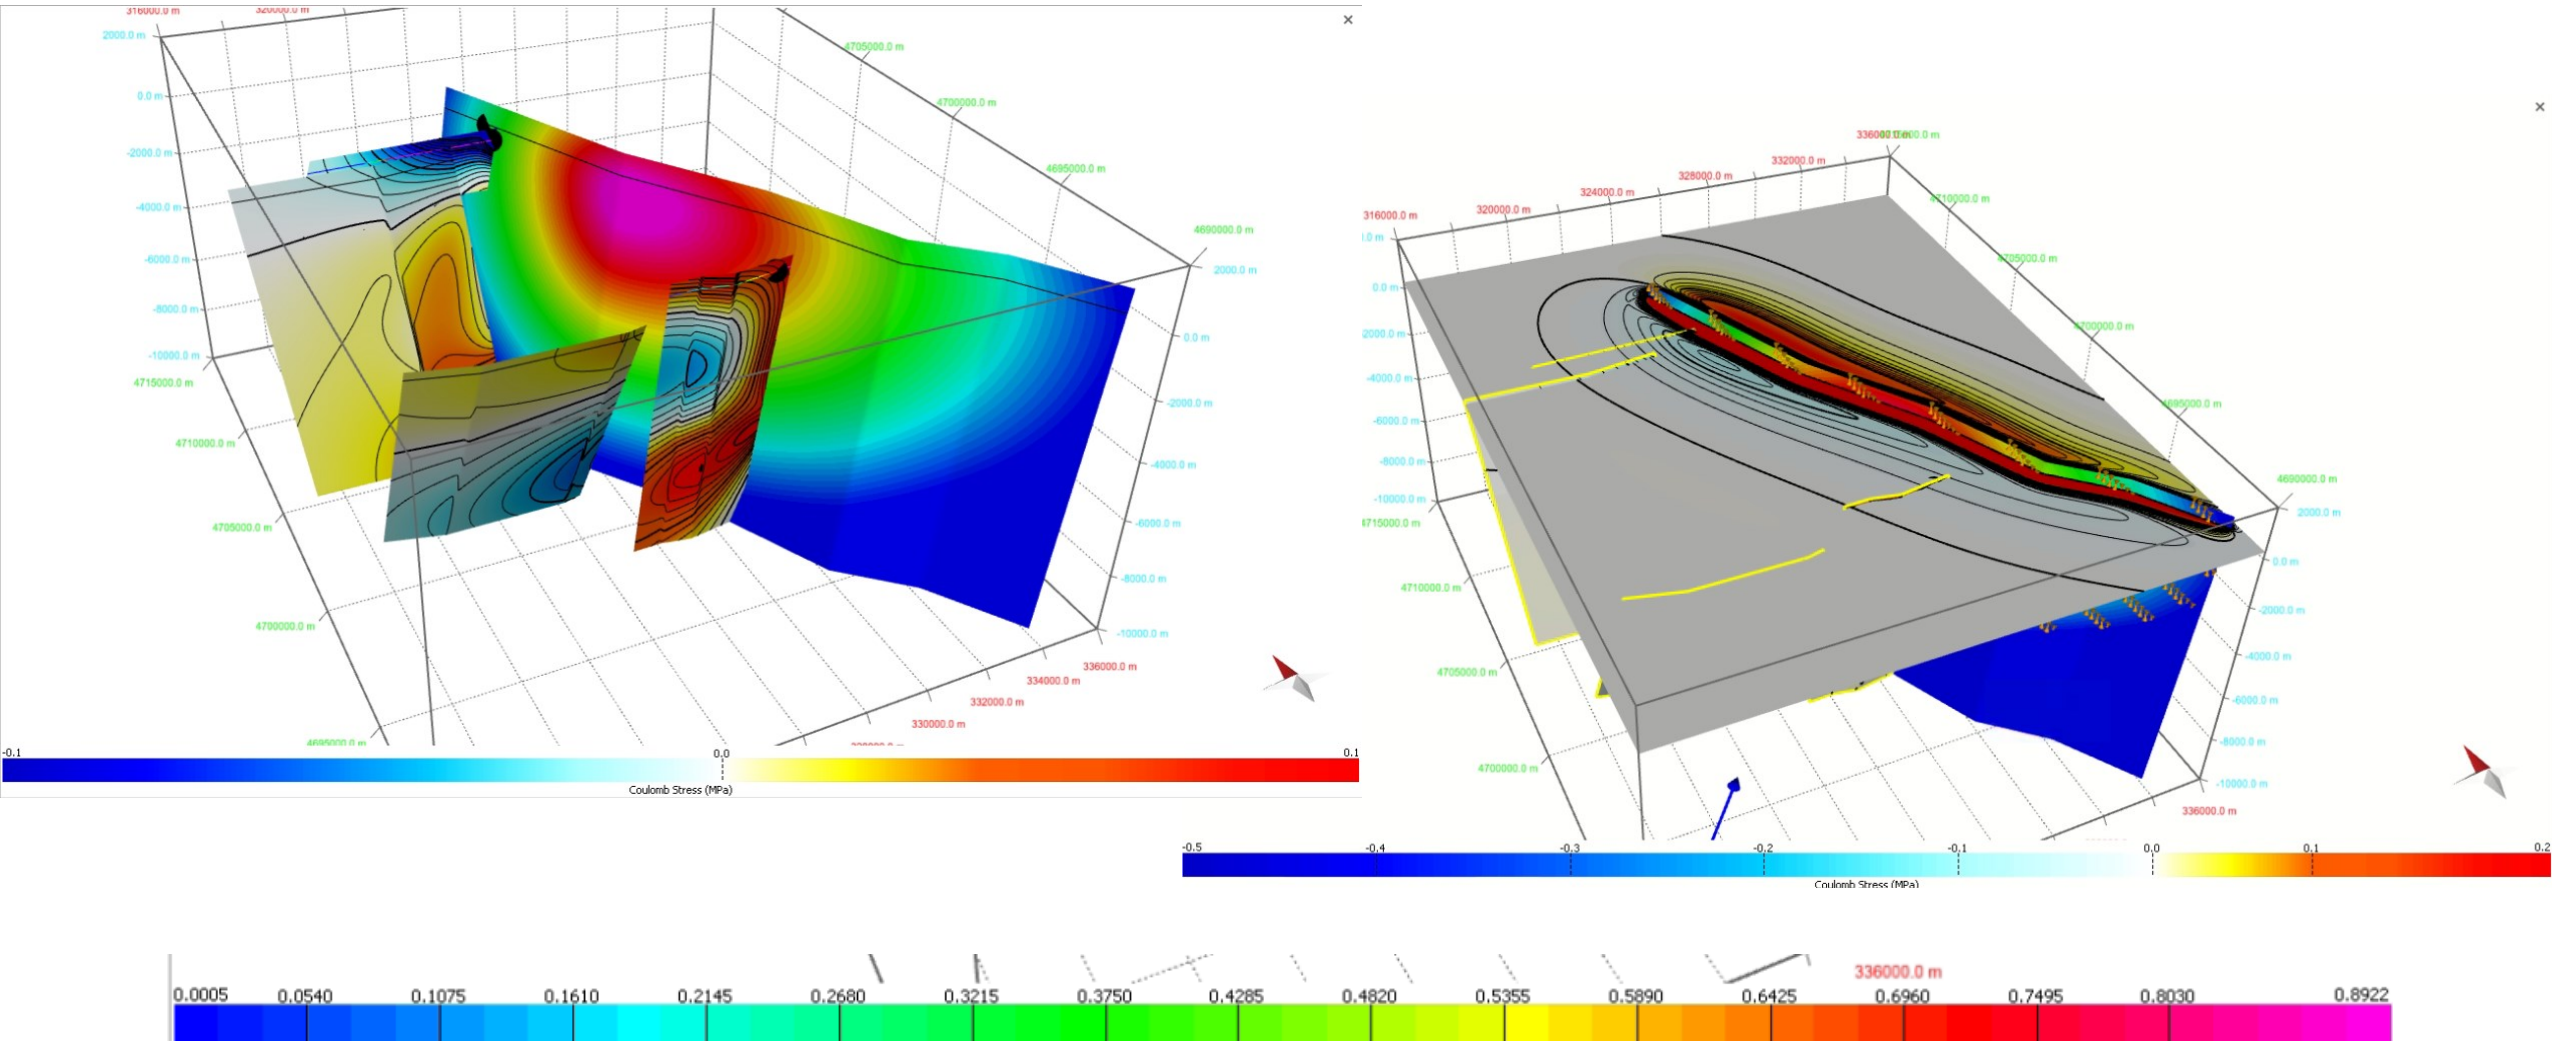

# MODEL 3: Max displacement to the south

Northern border faults are slightly loaded and the eastern segment of the southern faults at depths > 2 km

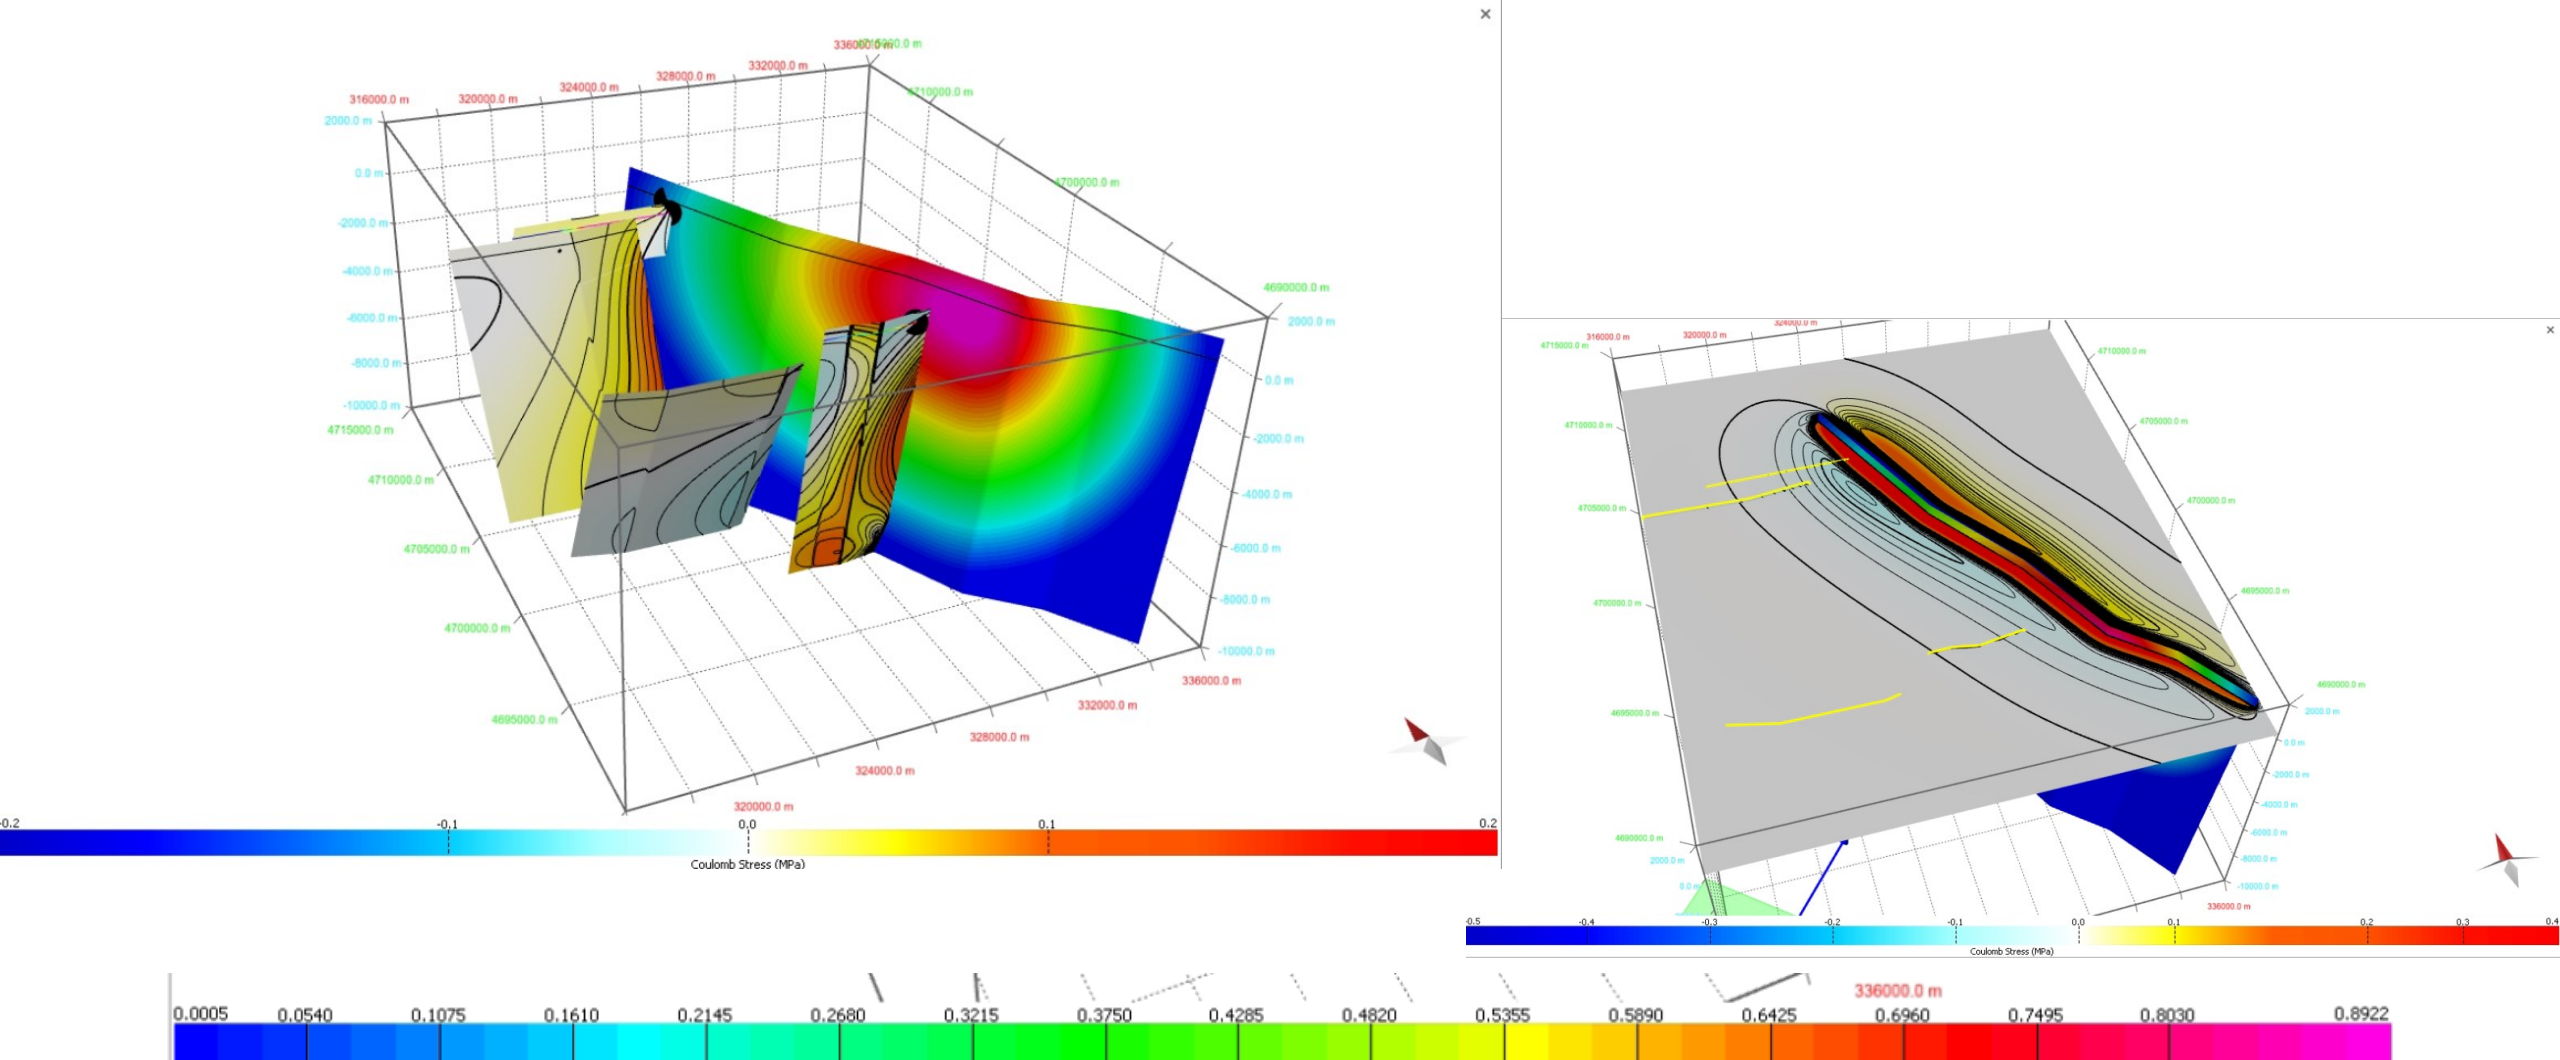

Supplement: Supplementary file [file egusphere-2025-2531-AC1-supplement.pdf]
